# Supplementary material
Source: PubMed Central journal article supplement (PMC4201988)
Supplement: 1400502_JI_1400502_Supplemental_Figures_1.pdf [file 1400502_JI_1400502_Supplemental_Figures_1.pdf]

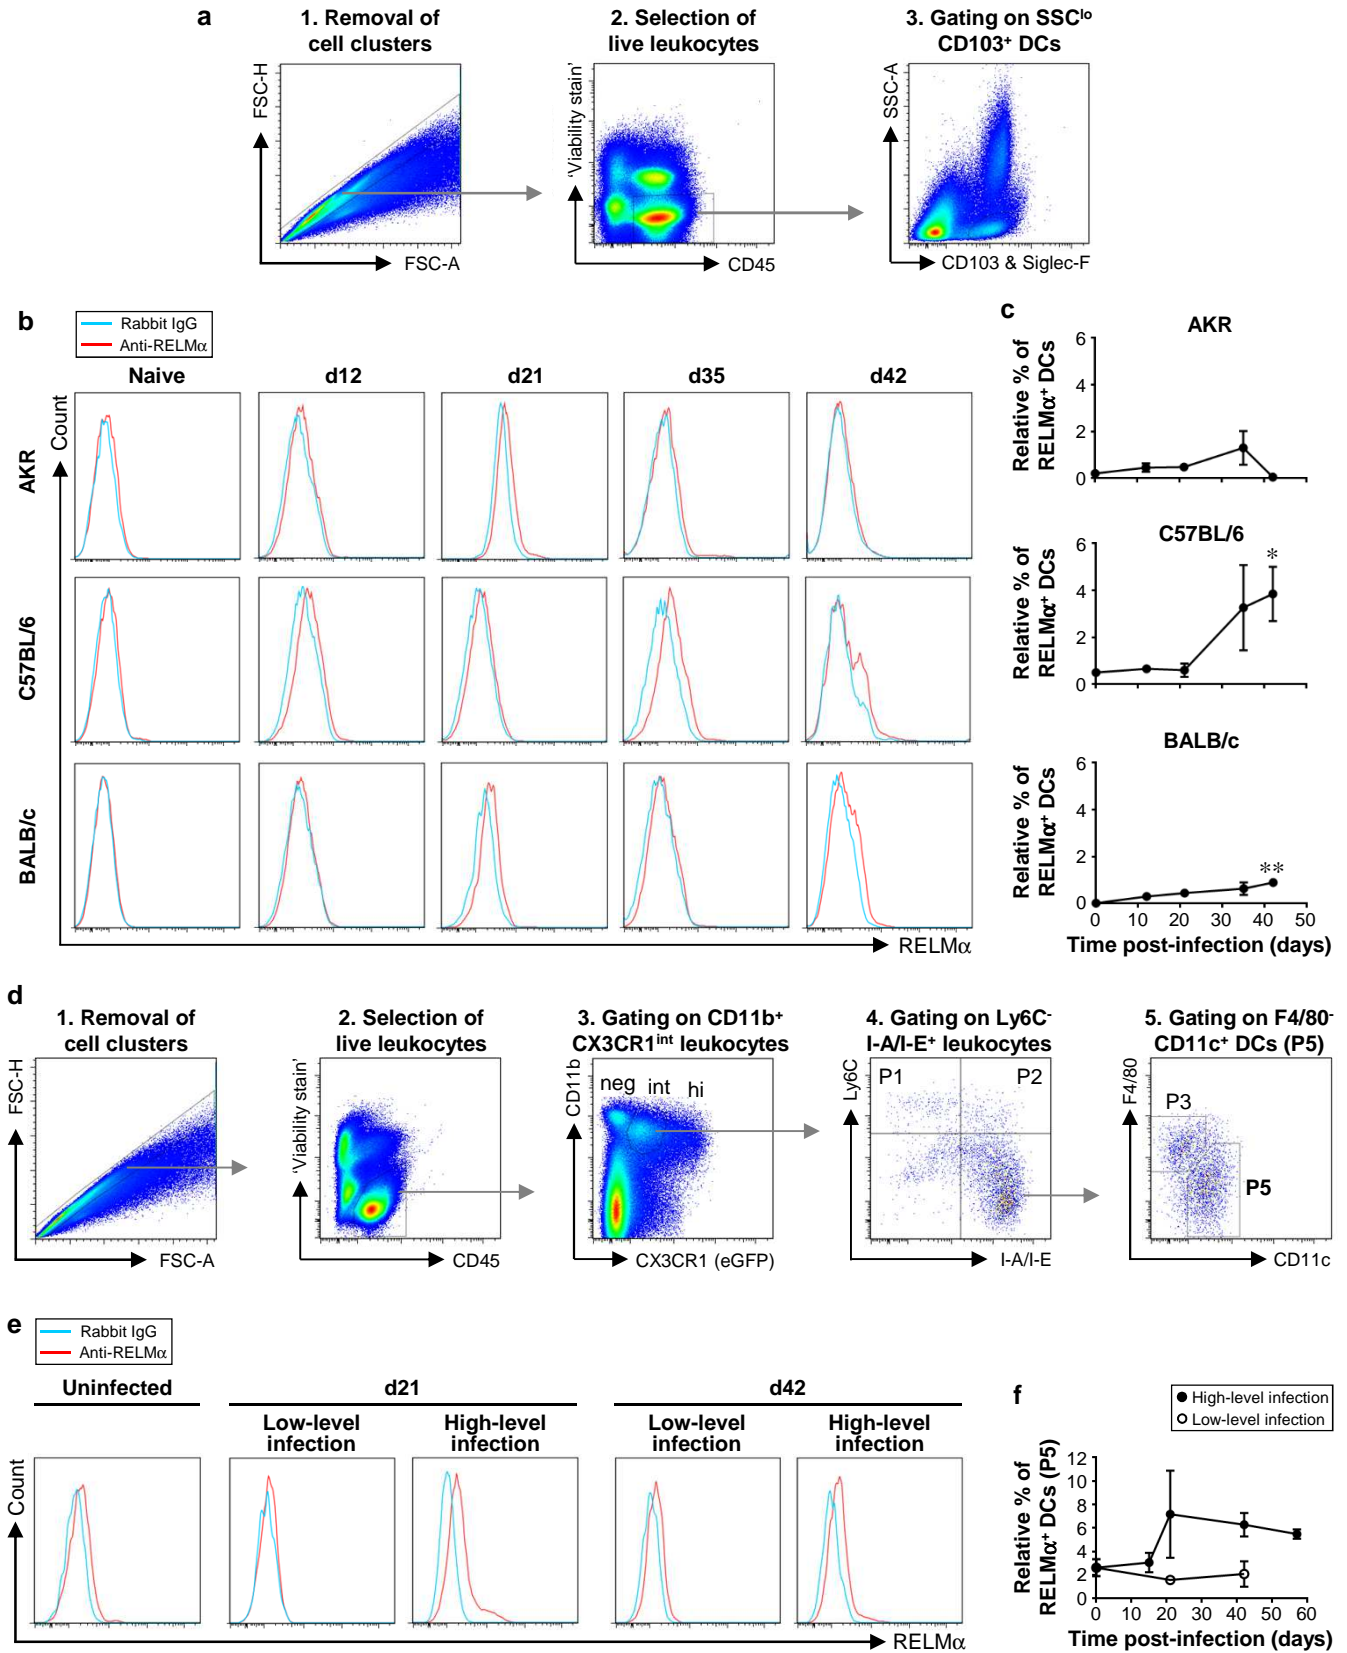

**Supplementary Figure 1. A minor fraction of DCs expresses RELM $\alpha$  and there is a small but significant increase in this population in the large intestine post-infection with *T. muris*.** Three different strains of mouse (AKR, C57BL/6 and BALB/c) were either left uninfected or infected with a high-level of *T. muris* ova. Cells were isolated from the lamina propria of the caecum and proximal colon, stained with a panel of fluorochrome-labelled antibodies and then analysed by flow cytometry. Live DCs were analysed by gating on 'viability stain'-negative CD45<sup>+</sup>CD103<sup>+</sup>SSC<sup>lo</sup> cells as shown in a. Representative histogram plots of RELM $\alpha$  staining are shown in b. Quantitative analysis of the staining is shown in c. CX3CR1<sup>9/9/+</sup> mice were infected with either a low-level or a high-level of *T. muris* ova. Another group of CX3CR1<sup>9/9/+</sup> mice was left uninfected. Cells were isolated from the lamina propria of the caecum and proximal colon, stained with a panel of fluorochrome-labelled antibodies and then analysed by flow cytometry. A population of CD11b<sup>+</sup>CX3CR1<sup>int</sup>Ly6C<sup>-</sup>I-A/I-E<sup>+</sup>F4/80<sup>+</sup>CD11c<sup>+</sup> DCs was identified (P5) as shown in d. Representative histogram plots of RELM $\alpha$  staining by this subpopulation of DCs (P5) are shown in e. Quantitative analysis of the staining is shown in f. The values are the means  $\pm$  SEM of five mice in each group and the results are representative of two separate experiments. \*P<0.05 (time-points post-infection compared with uninfected).

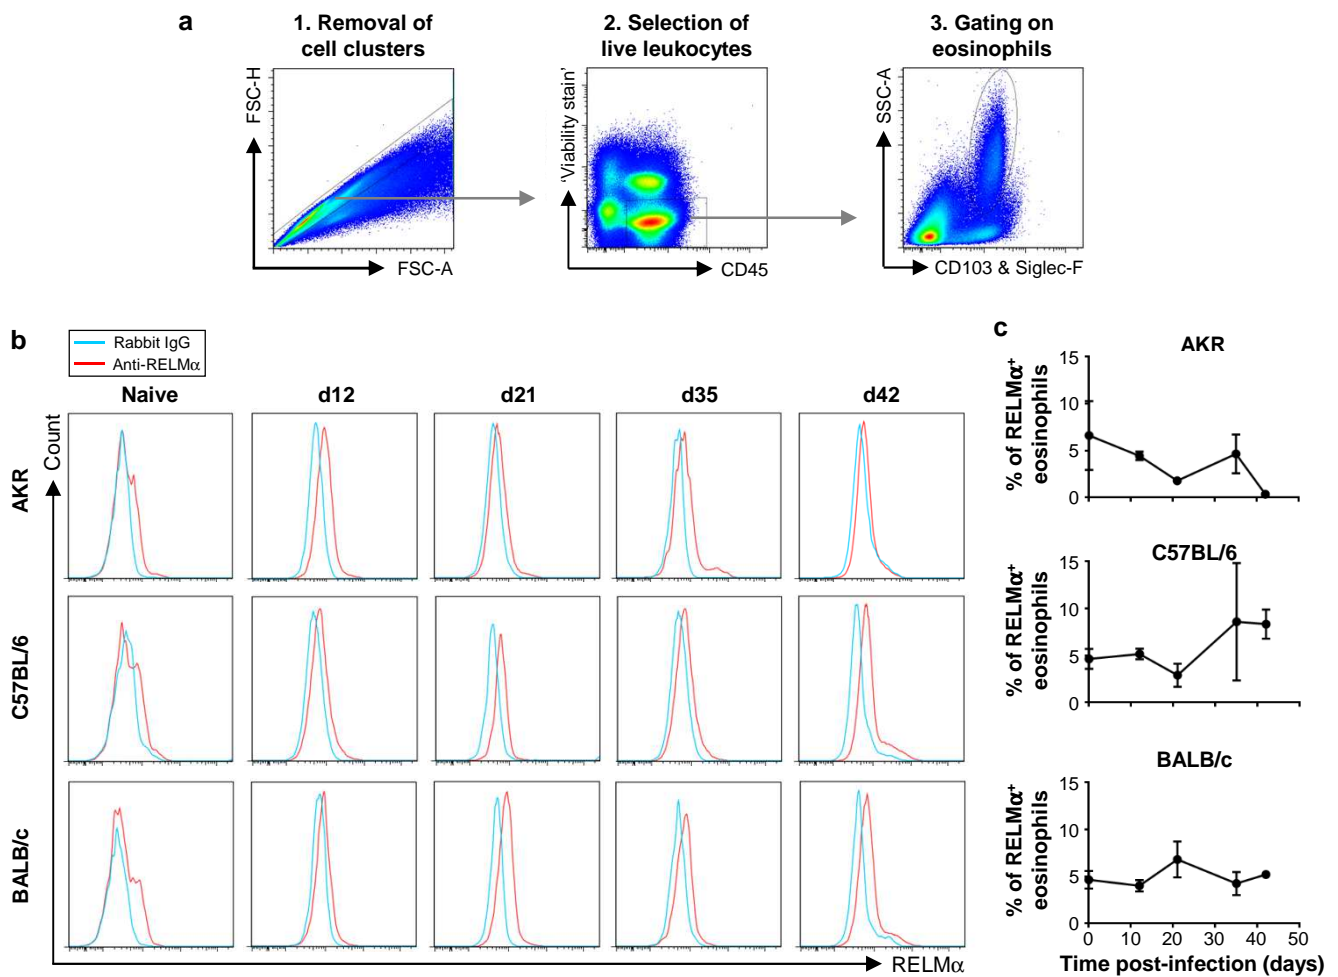

**Supplementary Figure 2. A minor fraction of eosinophils expresses RELM $\alpha$  but there is no significant increase in this population in the large intestine post-infection with *T. muris*.** Three different strains of mouse (AKR, C57BL/6 and BALB/c) were either left uninfected or infected with a high-level of *T. muris* ova. Cells were isolated from the lamina propria of the caecum and proximal colon, stained with a panel of fluorochrome-labelled antibodies and then analysed by flow cytometry. Live eosinophils were analysed by gating on 'viability stain'-negative CD45<sup>+</sup>Siglec-F<sup>+</sup>SSC<sup>hi</sup> cells as shown in **a**. Representative histogram plots of RELM $\alpha$  staining are shown in **b**. Quantitative analysis of the staining is shown in **c**. The values are the means  $\pm$  SEM of five mice in each group and the results are representative of two separate experiments.

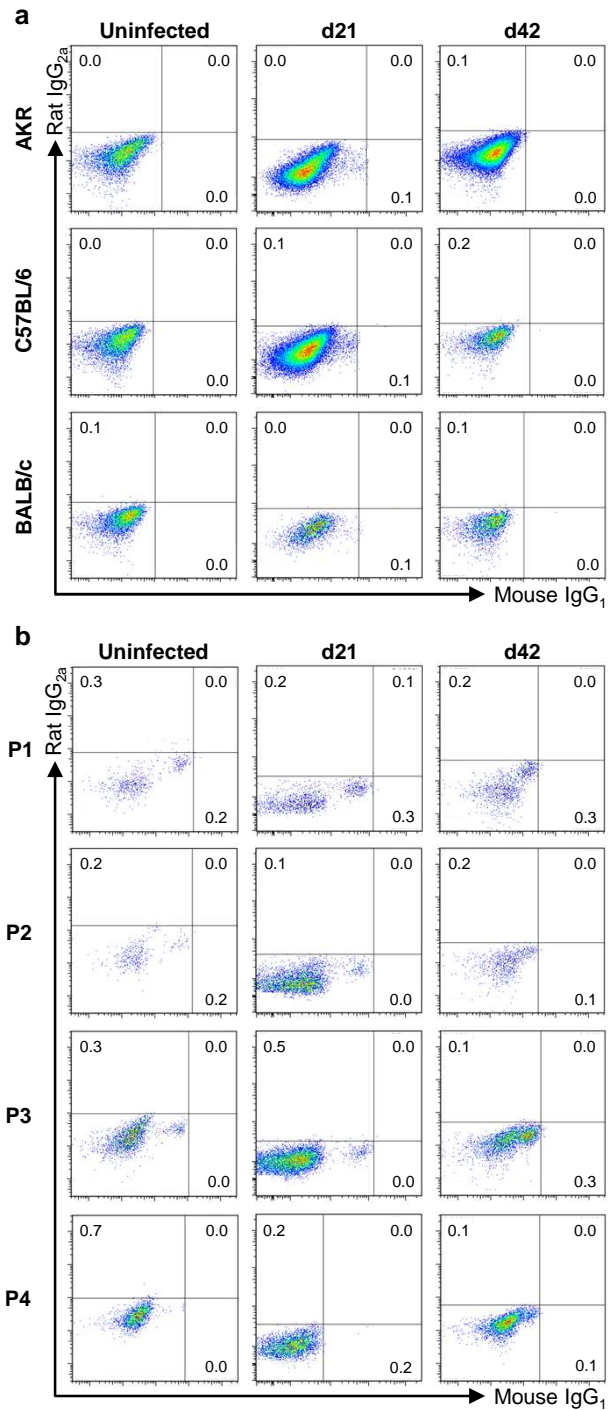

**Supplementary Figure 3. Fluorochrome-labelled isotype control antibody staining of macrophages in order to define the gates in Figure 6.** AKR, C57BL/6, BALB/c and CX3CR1<sup>9fp/+</sup> mice were infected with a high-level of *T. muris* ova. Each mouse was injected with 1.5 mg BrdU four hours before it was killed. Cells were isolated from the lamina propria of the caecum and proximal colon, stained with a panel of fluorochrome-labelled antibodies and then analysed by flow cytometry. In AKR, C57BL/6 and BALB/c mice (**a**), live Mφs were analysed by gating on 'viability stain'-negative CD45<sup>+</sup>CD11b<sup>+</sup>F4/80<sup>+</sup>CD103<sup>-</sup>Siglec-F<sup>-</sup> cells (as shown in Fig. 4a). In CX3CR1<sup>9fp/+</sup> mice (**b**), four populations of monocytes and Mφs (P1-P4, as defined in Fig. 5a) were analysed. Representative plots of Rat IgG<sub>2a</sub> (isotype control for the Ki-67 antibody) and Rat IgG<sub>1</sub> (isotype control for BrdU antibody) staining at selected time-points post-infection are shown.
